# Supplementary material for: Integrated Computational Approach for Virtual Hit Identification against Ebola Viral Proteins VP35 and VP40
Source: PubMed Central journal article supplement (PMC5133775; doi:10.3390/ijms17111748), 2016-10-26
Supplement: ijms-17-01748-s001.pdf [file ijms-17-01748-s001.pdf]

## Supplementary Materials: Integrated Computational Approach for Virtual Hit Identification against Ebola Viral Proteins: VP35 and VP40

Muhammad Usman Mirza and Nazia Ikram

**Table S1.** Autodock vina and DSX score obtained after docking of EBOV-VP35 co-crystalized active compounds against EBOV-Z VP35.

| VP35 Inhibitors | PDB ID | AutoDock Vina          | DSX-Score              |
|-----------------|--------|------------------------|------------------------|
|                 |        | EBOV-Z VP35 (kcal/mol) | EBOV-Z VP35 (kcal/mol) |
| VPL57           | 4IBI   | -8                     | -113.45                |
| VPL58           | 4IBJ   | -7.8                   | -98.23                 |
| VPL48           | 4IBG   | -7.3                   | -101.321               |
| VPL29           | 4IBE   | -7.2                   | -98.324                |
| GA017           | 4IBB   | -7.2                   | -115.2                 |
| VPL60           | 4IBK   | -7.2                   | -97.435                |
| VPL27           | 4IBD   | -7                     | -102.912               |
| GA246           | 4IBC   | -6.9                   | -95.82                 |
| VPL42           | 4IBF   | -6.8                   | -6.113                 |

The best autodock vina and DSX score obtained after docking simulations of active compounds against EBOV-Z VP35. The binding energy values are expressed in kcal/mol.

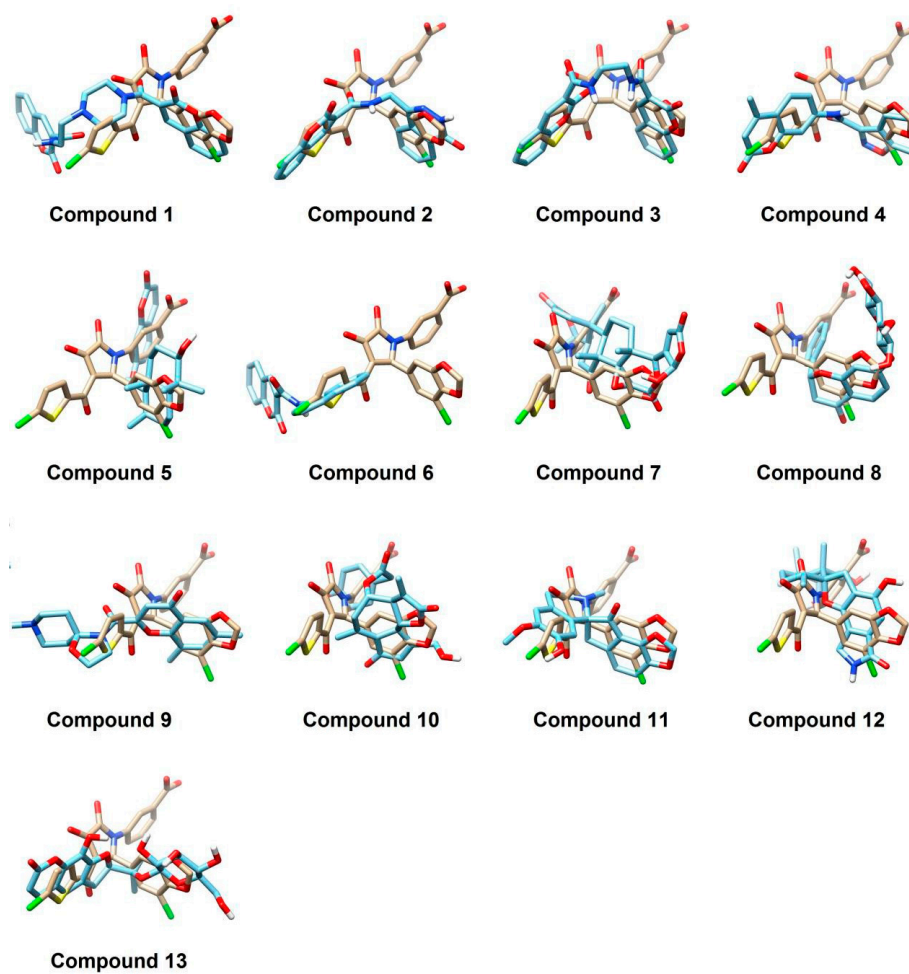

**Figure S1.** Interactive ligands pose analysis. Superimposition of virtually screen compounds in blue (1–13) on potent VP35 inhibitor (VPL60) in tan color.
